# Supplementary material for: Supersizing pyrrole-modified porphyrins by reversal of the ‘breaking and mending’ strategy
Source: Royal Society of Chemistry journal article supplement (doi:10.1039/c6cc04028d), 2016-01-01
Supplement: c6cc04028d1.pdf [file c6cc04028d1.pdf]

*ELECTRONIC SUPPORTING INFORMATION (ESI)*

*to:*

Supersizing pyrrole-modified porphyrins by reversal of  
the ‘breaking and mending’ strategy

*Michael Luciano<sup>a</sup>, Weston Tardie<sup>a</sup>, Matthias Zeller<sup>b</sup>, and Christian Brückner<sup>a\*</sup>*

*Department of Chemistry, University of Connecticut, Storrs, CT, 06269-3060, USA*

*and*

*Department of Chemistry, Purdue University, West Lafayette, IN 47907-2084, USA*

<sup>a</sup> University of Connecticut

<sup>b</sup> Purdue University

\* Author to whom correspondence should be addressed: Fax: (+1) 860-486-2981;  
Tel: (+1) 860-486-2743; e-mail: c.bruckner@uconn.edu

## TABLE OF CONTENTS

|                                                                                                           |           |
|-----------------------------------------------------------------------------------------------------------|-----------|
| <b>Materials and Instruments</b> .....                                                                    | <b>3</b>  |
| <b><i>meso</i>-Tetraphenyl imidazolidinone-annulated dihydrochlorin <b>8</b></b> .....                    | <b>4</b>  |
| <b>Figure S1.</b> UV-vis spectrum (CH <sub>2</sub> Cl <sub>2</sub> ) of <b>8</b> .....                    | 4         |
| <b>Figure S2.</b> <sup>1</sup> H NMR (400 MHz, CDCl <sub>3</sub> ) of <b>8</b> .....                      | 5         |
| <b>Figure S3.</b> <sup>13</sup> C NMR (100 MHz, DMSO-d <sub>6</sub> ) of <b>8</b> .....                   | 6         |
| <b>Figure S4.</b> FT-IR (neat, diamond ATR) of <b>8</b> .....                                             | 7         |
| <b>Figure S5.</b> HR-MS (ESI <sup>+</sup> , 100% CH <sub>3</sub> CN, TOF) of <b>8</b> .....               | 7         |
| <b><i>meso</i>-Tetraphenyl-<i>N,N'</i>-dimethylimidazolidinone-annulated dihydrochlorin <b>9</b></b> .... | <b>8</b>  |
| <b>Figure S6.</b> UV-vis spectrum (CH <sub>2</sub> Cl <sub>2</sub> ) of <b>9</b> .....                    | 8         |
| <b>Figure S7.</b> <sup>1</sup> H NMR (400 MHz, CDCl <sub>3</sub> ) of <b>9</b> .....                      | 9         |
| <b>Figure S8.</b> <sup>13</sup> C NMR (100 MHz, CDCl <sub>3</sub> ) of <b>9</b> .....                     | 10        |
| <b>Figure S9.</b> FT-IR (neat, diamond ATR) of <b>9</b> .....                                             | 11        |
| <b>Figure S10.</b> HR-MS (ESI <sup>+</sup> , 100% CH <sub>3</sub> CN, TOF) of <b>9</b> .....              | 11        |
| <b><i>meso</i>-Tetraphenyl-2-aza-3-oxoporphyrin <b>10</b></b> .....                                       | <b>12</b> |
| <b>Figure S11.</b> UV-vis spectrum (CH <sub>2</sub> Cl <sub>2</sub> ) of <b>10</b> .....                  | 12        |
| <b>Figure S12.</b> <sup>1</sup> H NMR (400 MHz, CDCl <sub>3</sub> ) of <b>10</b> .....                    | 13        |
| <b>Figure S13.</b> HR-MS (ESI <sup>+</sup> , 100% CH <sub>3</sub> CN, TOF) of <b>10</b> .....             | 14        |
| <b>1,3,6-Triazocine-2,4-8-trione-based Pyrrole-modified Porphyrin <b>11</b></b> .....                     | <b>15</b> |
| <b>Figure S14.</b> UV-vis spectrum (CH <sub>2</sub> Cl <sub>2</sub> ) of <b>11</b> .....                  | 15        |
| <b>Figure S15.</b> <sup>1</sup> H NMR (400 MHz, CDCl <sub>3</sub> ) of <b>11</b> .....                    | 16        |
| <b>Figure S16.</b> <sup>13</sup> C NMR (100 MHz, CDCl <sub>3</sub> ) of <b>11</b> .....                   | 17        |
| <b>Figure S17.</b> FT-IR (neat, diamond ATR) of <b>11</b> .....                                           | 18        |
| <b>Figure S18.</b> HR-MS (ESI <sup>+</sup> , 100% CH <sub>3</sub> CN, TOF) of <b>11</b> .....             | 18        |
| <b>Crystallographic Details for Pyrrole-modified Porphyrin <b>11</b></b> :.....                           | <b>19</b> |
| <b>Table 1. Experimental Details for X-Ray Analysis of <b>11</b></b> .....                                | <b>20</b> |

## Materials and Instruments

All solvents and reagents (Aldrich, Acros, CIL) were used as received. Tetraphenyl-2,3-dioxochlorin was prepared as described previously.<sup>1</sup>

Analytical (aluminum backed, silica gel 60, 250  $\mu\text{m}$  thickness) and preparative (20  $\times$  20 cm, glass backed, silica gel 60, 500 or 1000  $\mu\text{m}$  thickness) TLC plates and the flash column silica gel (premium grade, 60  $\text{\AA}$ , 32-63  $\mu\text{m}$ ) were provided by Sorbent Technologies, Atlanta, GA.

<sup>1</sup>H and <sup>13</sup>C NMR spectra were recorded on a Bruker DRX400 instrument. High and low resolution mass spectra were provided by the Mass Spectrometry Facilities at the Department of Chemistry, University of Connecticut. UV-vis spectra were recorded on a Cary 50, Varian Inc. IR spectra on a Bruker Alpha FT-IR with ATR (diamond) cell.

---

(1) Daniell, H. W.; Williams, S. C.; Jenkins, H. A.; Brückner, C. *Tetrahedron Lett.* **2003**, *44*, 4045-4049.

### **meso-Tetraphenyl imidazolidinone-annulated dihydroxychlorin 8.**

Porphyrin Dione **7** (118.0 mg,  $1.83 \times 10^{-4}$  mol) was dissolved in pyridine (25.0 mL) in a RBF equipped with a magnetic stir bar. Urea (245 mg,  $4.1 \times 10^{-3}$  mol, 22 equiv) was added and the mixture was heated to reflux for 30 min under a  $N_2$  atmosphere. Subsequently, the solvent was evaporated *in vacuo*. The remaining residue was taken up in  $CHCl_3$  and filtered through a glass frit. The filtrate was washed with water ( $5 \times 25$  mL) and dried over  $Na_2SO_4$ . The dried residue was separated by column chromatography ( $CH_2Cl_2$ -5% MeOH), recovering dione **7** in 8% yield (9 mg), followed by the magenta product **8** in 85% yield (110.5 mg):  $R_f$  (silica- $CH_2Cl_2$ /5% MeOH) = 0.36;  $^1H$  NMR (400 MHz,  $CDCl_3$ ):  $\delta$  8.64 (d,  $^3J = 4.7$  Hz, 1H), 8.49 (s, 1H), 8.21 (s, 1H), 8.14 (d,  $^3J = 5.8$  Hz, 3H), 7.86 (d,  $^3J = 6.8$  Hz, 1H), 7.72 (m, 6H), 5.34 (br s, 1H, exchangeable with  $D_2O$ ), 4.26 (br s, 1H, exchangeable with  $D_2O$ ), -2.03 (br s, 1H, exchangeable with  $D_2O$ ) ppm;  $^{13}C$  NMR (100 MHz,  $DMSO-d_6$ ):  $\delta$  159.5, 158.5, 152.8, 141.4, 141.1, 140.0, 135.4, 135.2, 134.12, 134.10, 134.08, 134.06, 133.18, 133.13, 128.55, 128.44, 127.50, 127.33, 127.26, 125.7, 123.1, 112.9, 93.5 ppm; UV-vis ( $CH_2Cl_2$ )  $\lambda_{max}$  (log  $\epsilon$ ) 406 (5.41), 512 (4.30), 541 (4.30), 591 (3.96), 642 (4.53) nm; FT-IR (neat, diamond ATR):  $\nu_{C=O} = 1715.7$   $cm^{-1}$ ; MS (ESI $^+$ , 100%  $CH_3CN$ , TOF)  $m/z$  calcd for  $C_{45}H_{33}N_6O_3$  ( $[M \cdot H]^+$ ) 705.2609, found 705.2605.

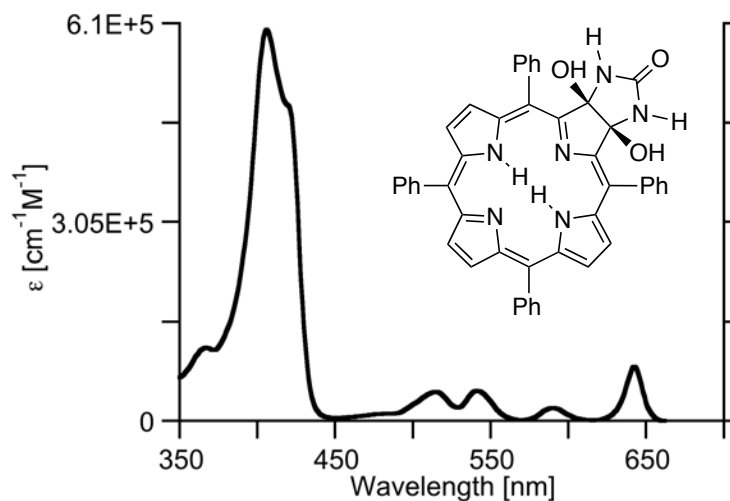

**Figure S1.** UV-vis spectrum ( $CH_2Cl_2$ ) of **8**.

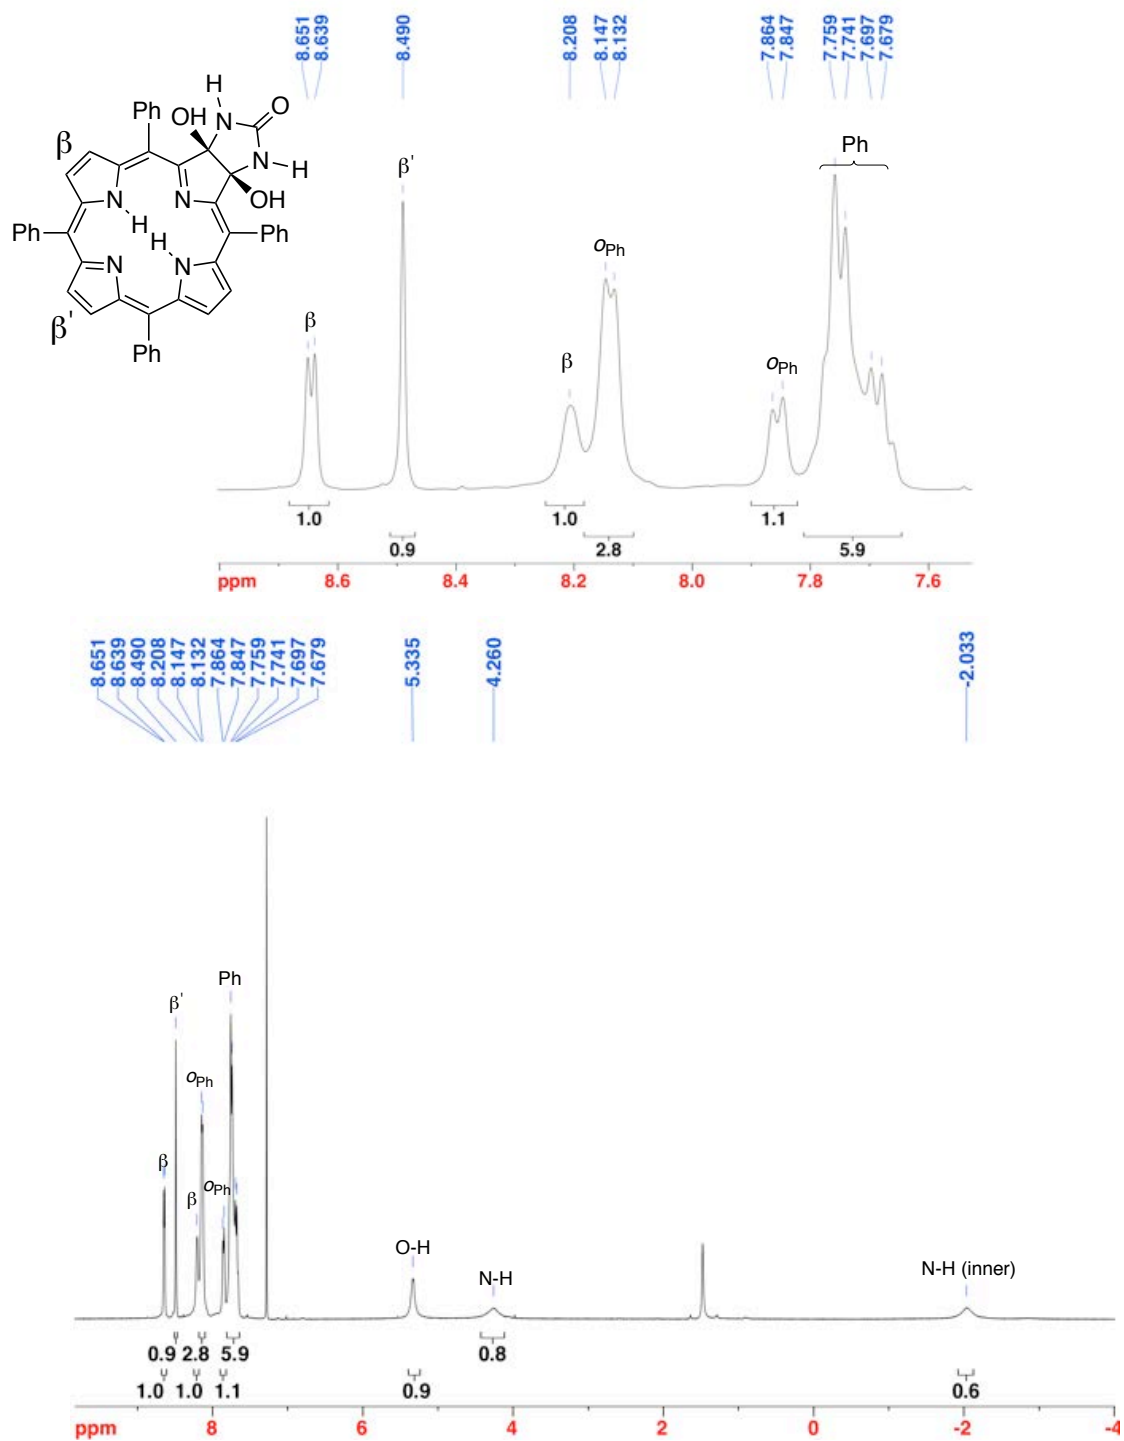

**Figure S2.**  $^1\text{H}$  NMR (400 MHz,  $\text{CDCl}_3$ ) of **8**.

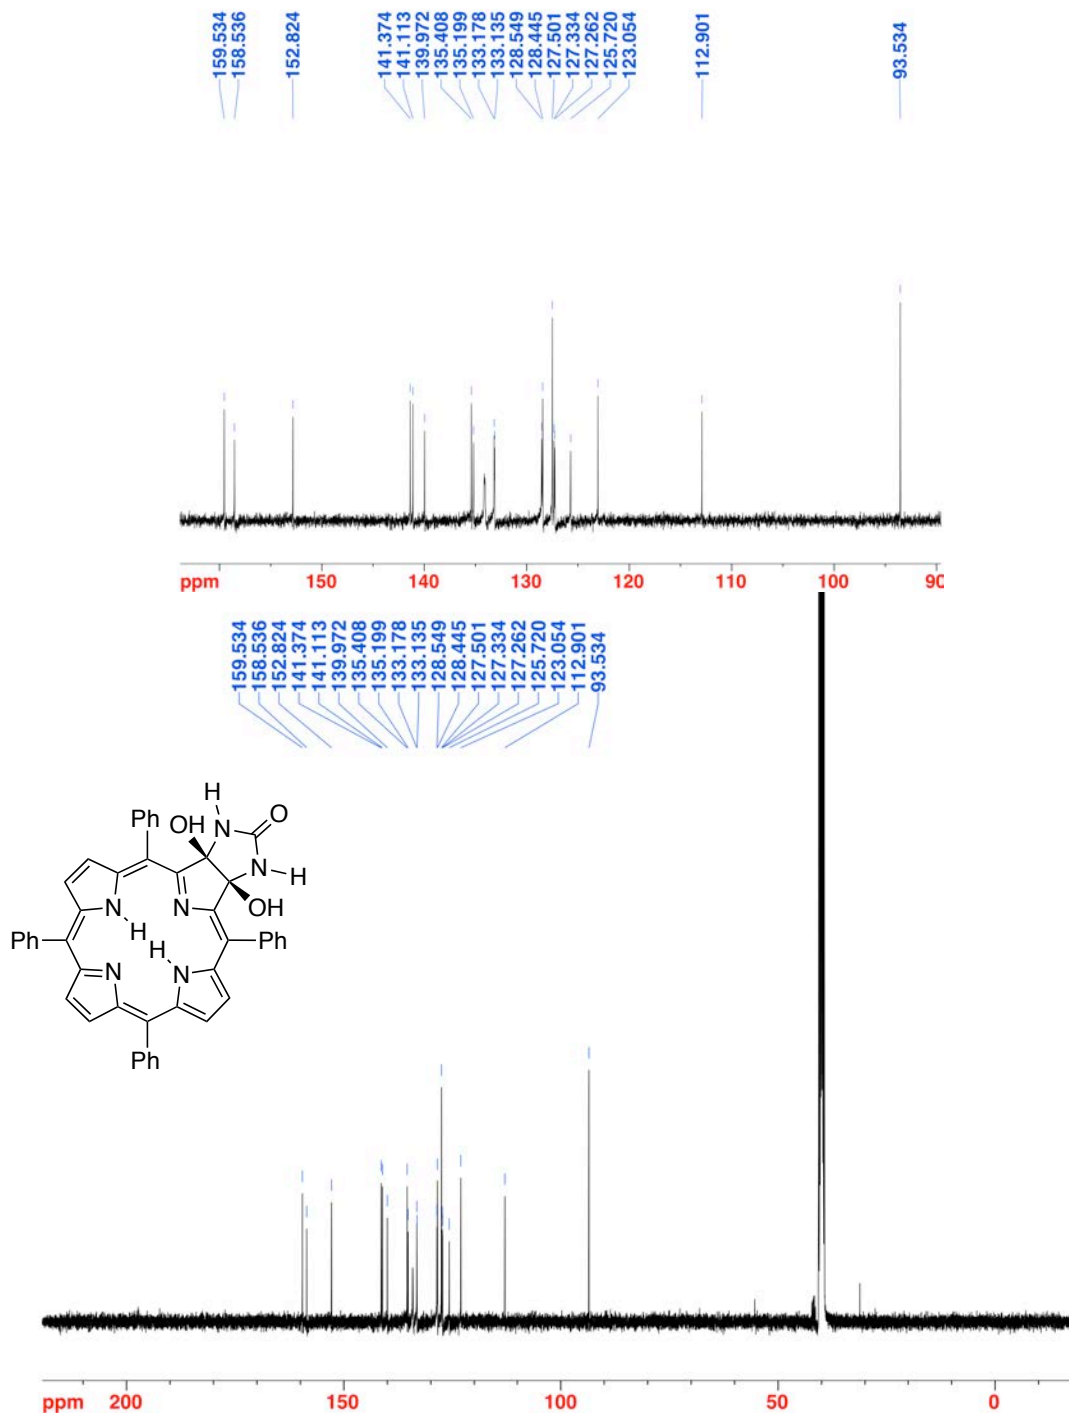

Figure S3. <sup>13</sup>C NMR (100 MHz, DMSO-d<sub>6</sub>) of 8.

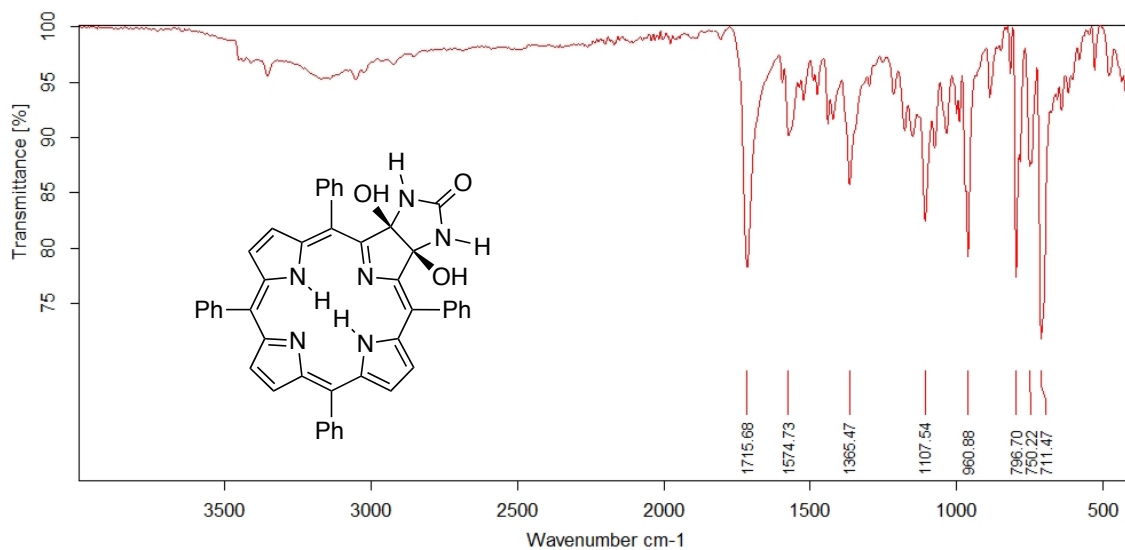

**Figure S4.** FT-IR (neat, diamond ATR) of **8**.

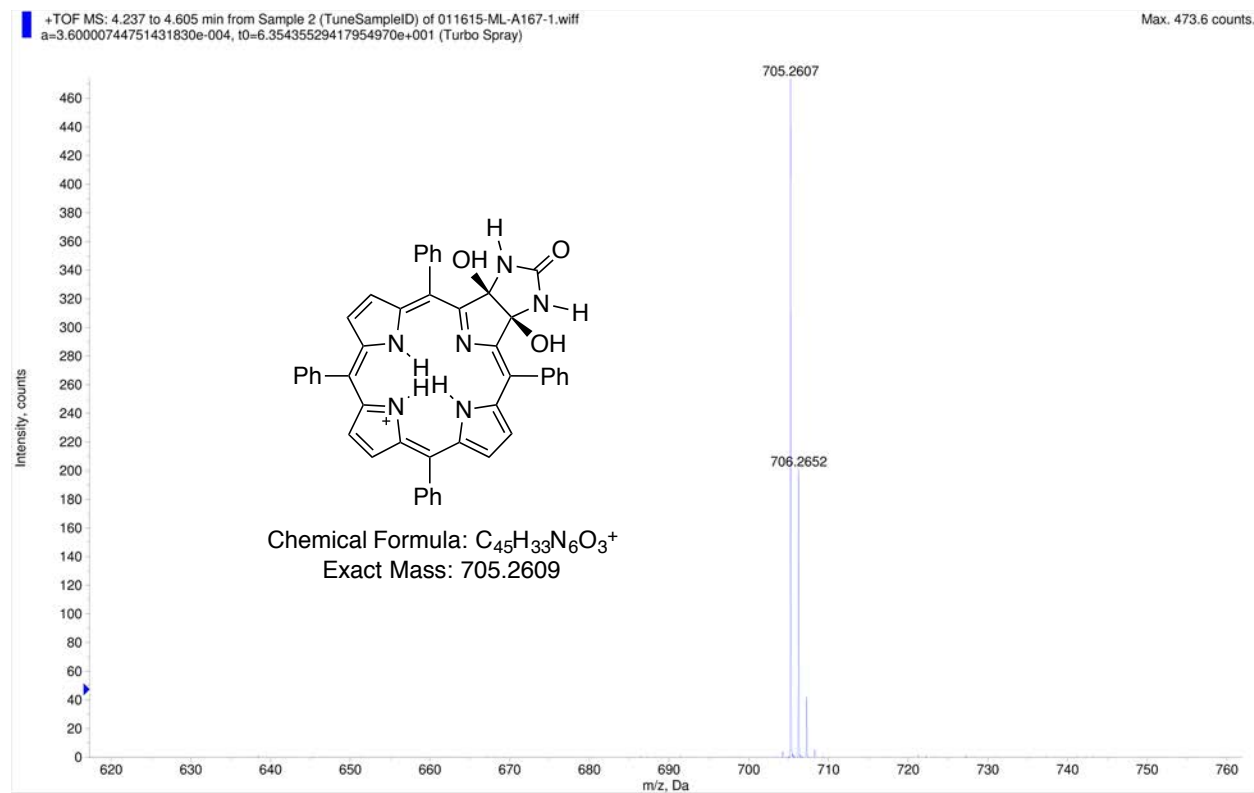

**Figure S5.** HR-MS ( $ESI^+$ , 100%  $CH_3CN$ , TOF) of **8**.

**meso-Tetraphenyl-*N,N'*-dimethylimidazolidinone-annulated dihydroxychlorin 9.**

Prepared from 2,3-dioxochlorin **7** (30.0 mg,  $4.65 \times 10^{-5}$  mol) in pyridine (8.0 mL) as described for **8** using *N,N'*-dimethylurea (82 mg,  $9.31 \times 10^{-4}$  mol, 20 equiv.) to afford the red dihydroxychlorin **9** in 54% yield (18.5 mg):  $R_f$  (silica- $\text{CH}_2\text{Cl}_2/3\%$  MeOH) = 0.56;  $^1\text{H}$  NMR (400 MHz,  $\text{CDCl}_3$ ):  $\delta$  8.57 (d,  $^3J = 4.9$  Hz, 1H), 8.45 (s, 1H), 8.16 (d,  $^3J = 6.7$  Hz, 1H), 8.07 (d,  $^3J = 5.2$  Hz, 4H), 7.78-7.67 (m, 6H), 4.55 (s, 1H, exchangeable with  $\text{D}_2\text{O}$ ), 2.28 (s, 3H), -1.75 (s, 1H, exchangeable with  $\text{D}_2\text{O}$ ) ppm;  $^{13}\text{C}$  NMR (100 MHz,  $\text{CDCl}_3$ ):  $\delta$  161.4, 154.2, 153.5, 141.4, 139.8, 136.0, 135.4, 134.1, 132.9, 128.7, 127.97, 127.88, 127.6, 127.3, 126.81, 126.73, 125.3, 123.7, 112.8, 97.1, 26.4 ppm; UV-vis ( $\text{CH}_2\text{Cl}_2$ )  $\lambda_{\text{max}}$  (log  $\epsilon$ ) 410 (4.99), 520 (3.84), 549 (3.88), 596 (3.53), 649 (4.08) nm; FT-IR (neat, diamond ATR):  $\nu_{\text{C=O}} = 1680.4$   $\text{cm}^{-1}$ ; HR-MS (ESI $^-$ , 100%  $\text{CH}_3\text{CN}$ , TOF)  $m/z$  calcd for  $\text{C}_{47}\text{H}_{37}\text{N}_6\text{O}_3$  ( $[\text{M}\cdot\text{H}]^+$ ) 733.2922, found 733.2941.

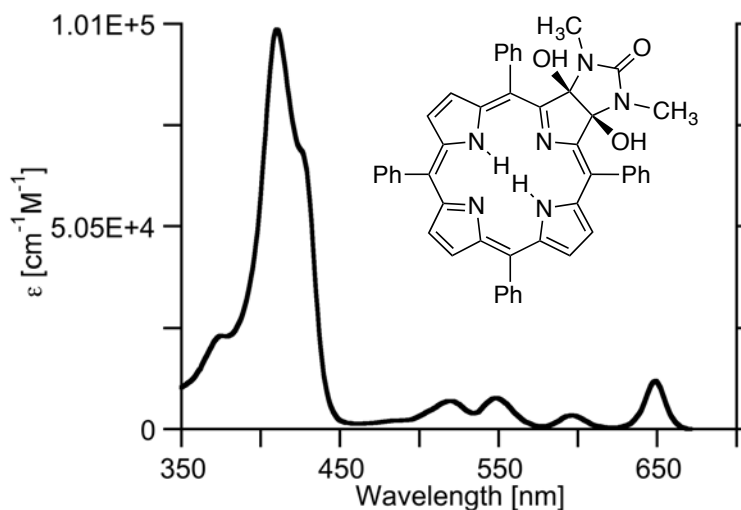

**Figure S6.** UV-vis spectrum ( $\text{CH}_2\text{Cl}_2$ ) of **9**.



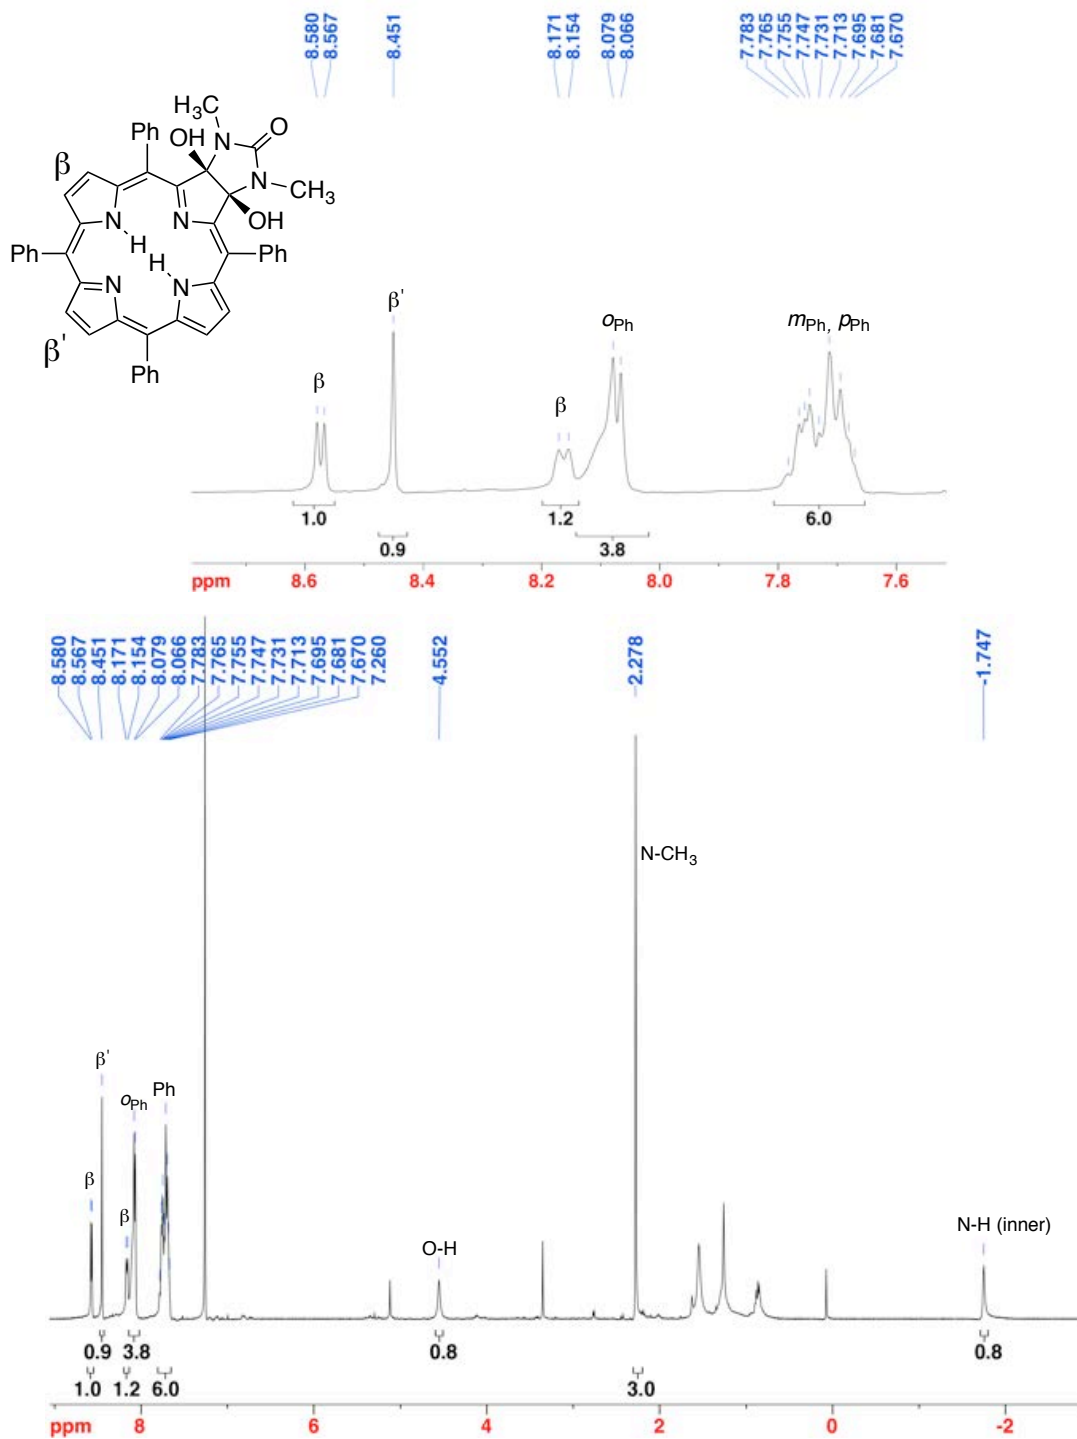

Figure S7.  $^1H$  NMR (400 MHz,  $CDCl_3$ ) of **9**.

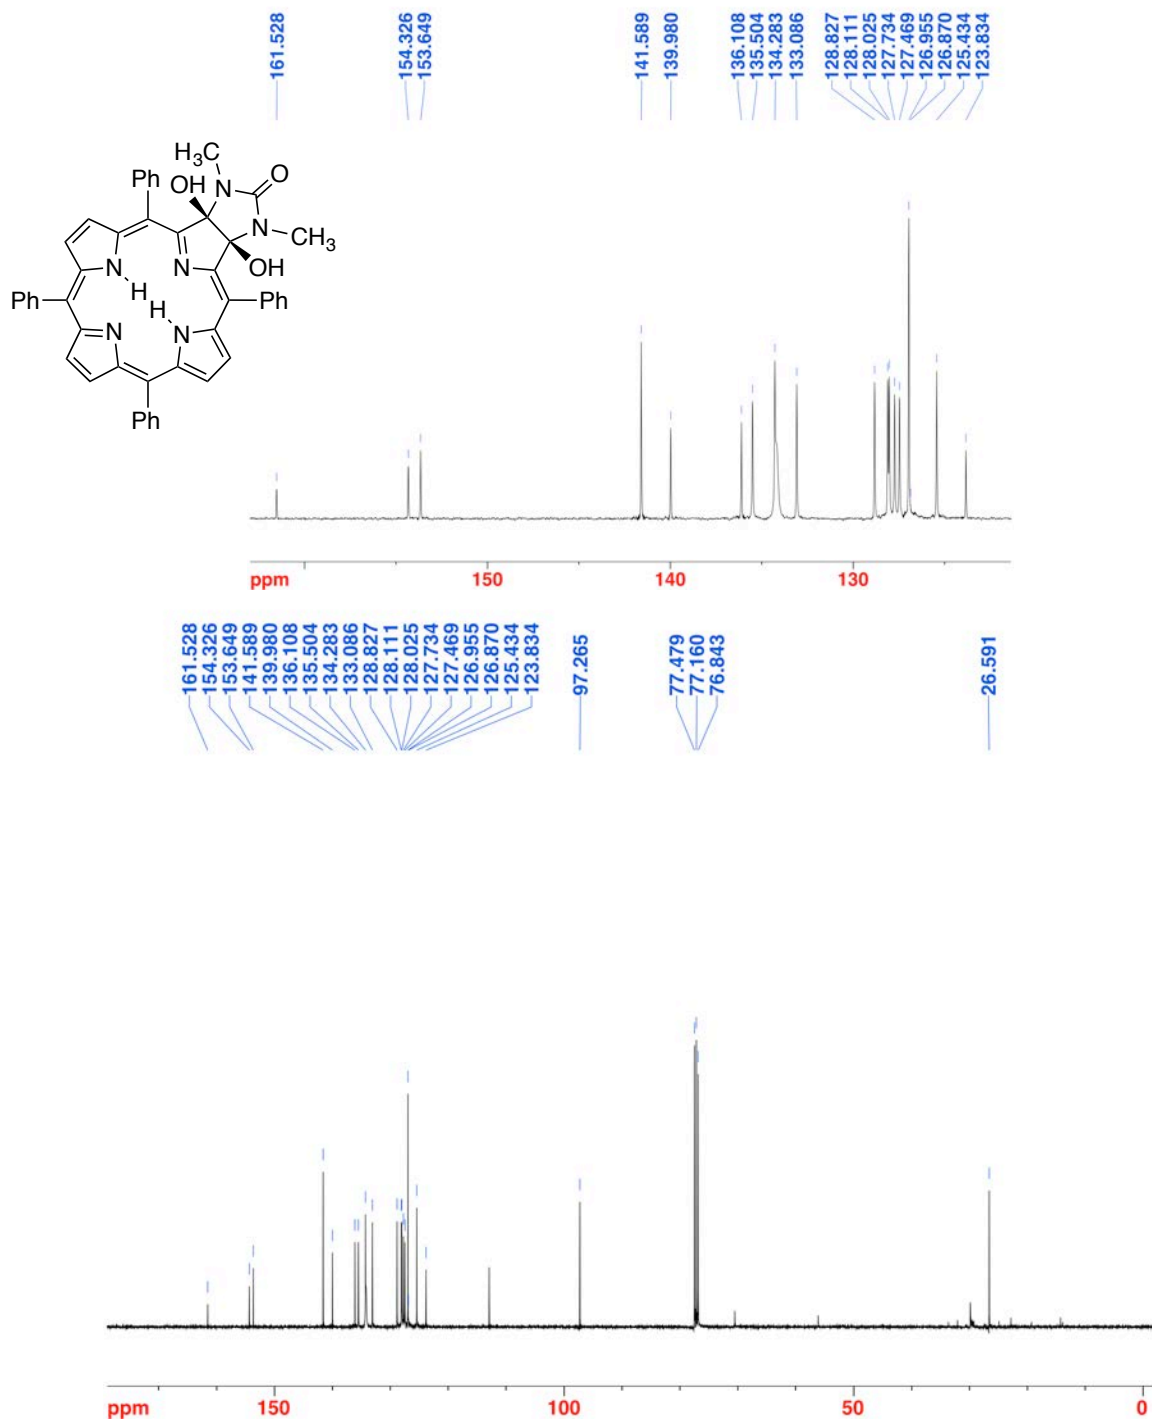

Figure S8.  $^{13}\text{C}$  NMR (100 MHz,  $\text{CDCl}_3$ ) of 9.

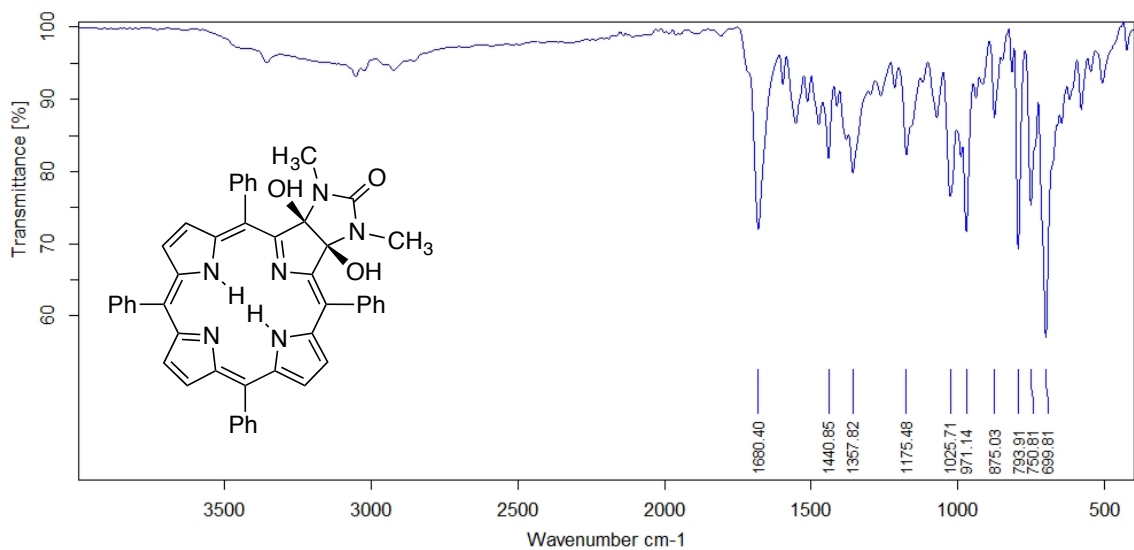

**Figure S9.** FT-IR (neat, diamond ATR) of **9**.

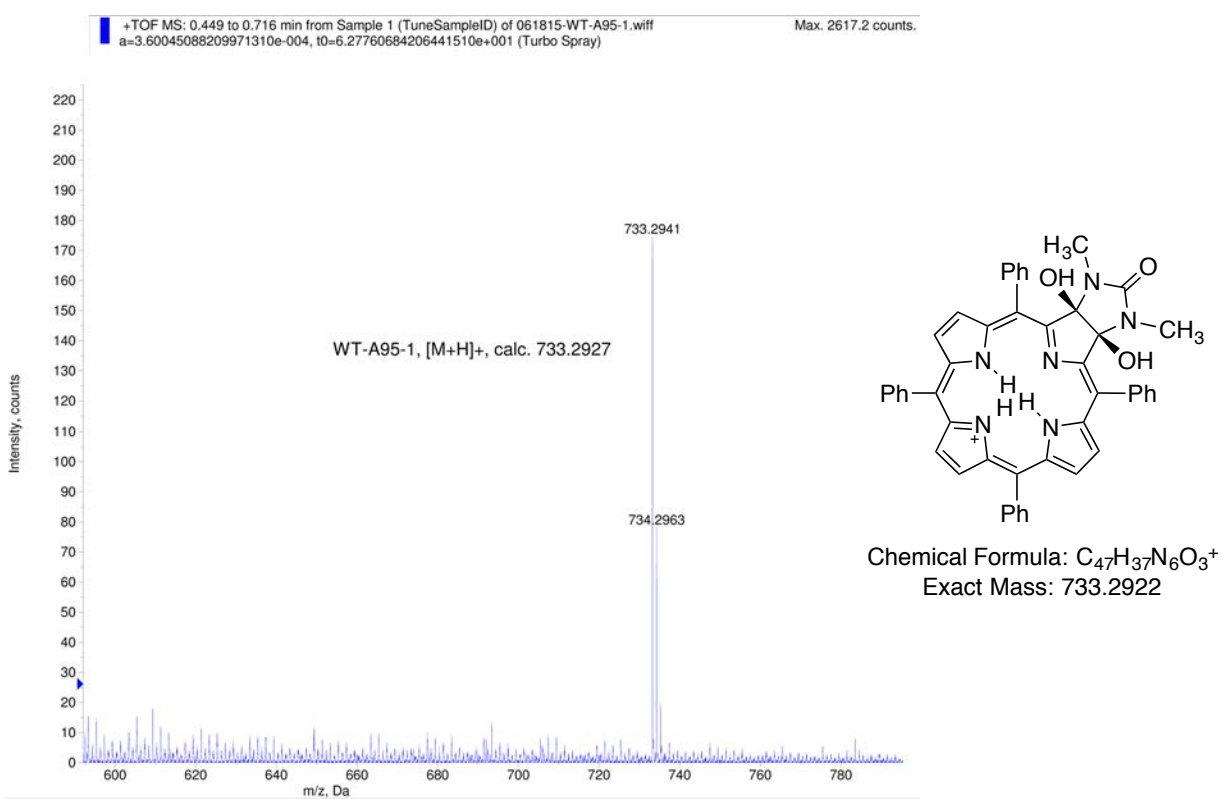

**Figure S10.** HR-MS (ESI<sup>+</sup>, 100% CH<sub>3</sub>CN, TOF) of **9**.

### **meso-Tetraphenyl-2-aza-3-oxoporphyrin 10.**

Dihydroxychlorin **8** (28.8 mg,  $4.6 \times 10^{-5}$  mol) was dissolved in dry THF (11.0 mL) and  $\text{Et}_3\text{N}$  (5-6 drops) in a RBF equipped with a magnetic stir bar.  $\text{Pb}(\text{OAc})_4$  (31.4 mg,  $7.1 \times 10^{-5}$  mol, 1.7 equiv.) was added in portions and the reaction mixture was stirred at ambient temperature. When the starting material was consumed (reaction control by UV-vis and TLC), the solvent was removed by rotary evaporation and the remaining residue was purified by preparative TLC (silica- $\text{CH}_2\text{Cl}_2/1\%$  MeOH) to afford known.<sup>2</sup> porpholactam **10** in 69% yield (17.8 mg): (data included for comparison)  $^1\text{H}$  NMR (400 MHz,  $\text{CDCl}_3$ ):  $\delta$  9.65 (s, 1H, exchangeable with  $\text{D}_2\text{O}$ ), 8.79 (d,  $^3J = 5.0$  Hz, 1H), 8.71 (d,  $^3J = 4.7$  Hz, 1H), 8.64 (d,  $^3J = 5.0$  Hz, 1H), 8.61-8.54 (m, 3H), 8.16-8.12 (m, 4H), 8.10-8.07 (m, 2H), 7.99 (m, 2H), 7.81 (m, 3H), 7.77-7.69 (m, 9H), -1.87 (s, 1H, exchangeable with  $\text{D}_2\text{O}$ ), -2.14 (s, 1H, exchangeable with  $\text{D}_2\text{O}$ ) ppm.

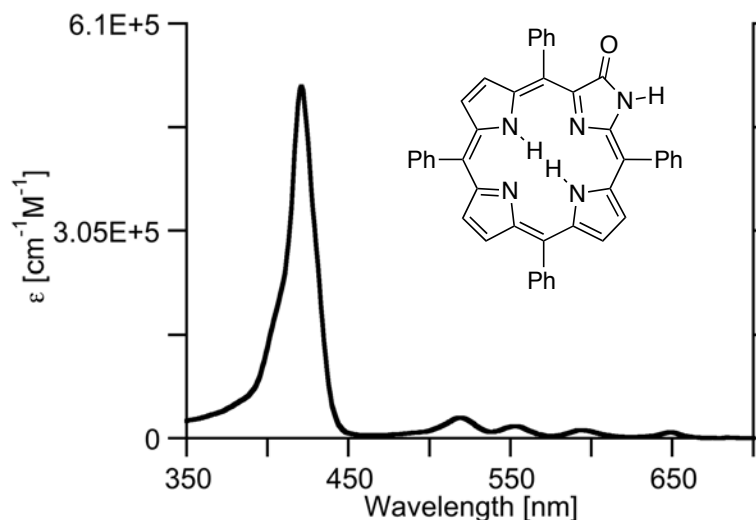

**Figure S11.** UV-vis spectrum ( $\text{CH}_2\text{Cl}_2$ ) of **10**

(2) J. Akhigbe, J. P. Haskoor, J. A. Krause, M. Zeller and C. Brückner, *Org. Biomol. Chem.*, 2013, **11**, 3616–3628.

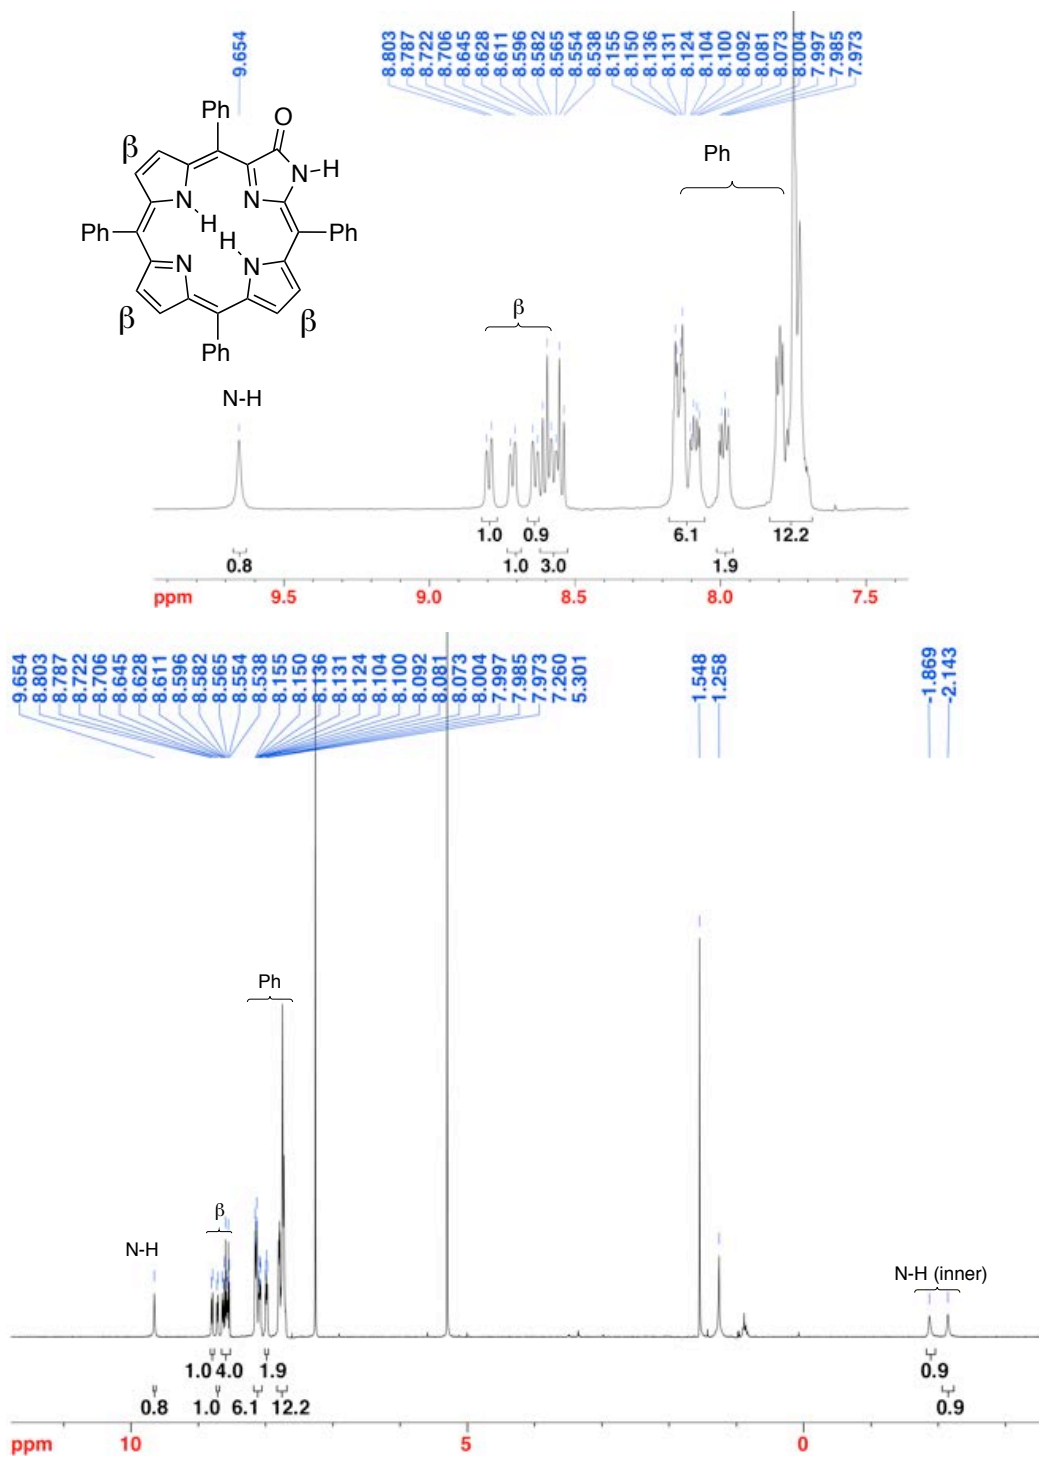

Figure S12. <sup>1</sup>H NMR (400 MHz, CDCl<sub>3</sub>) of 10.

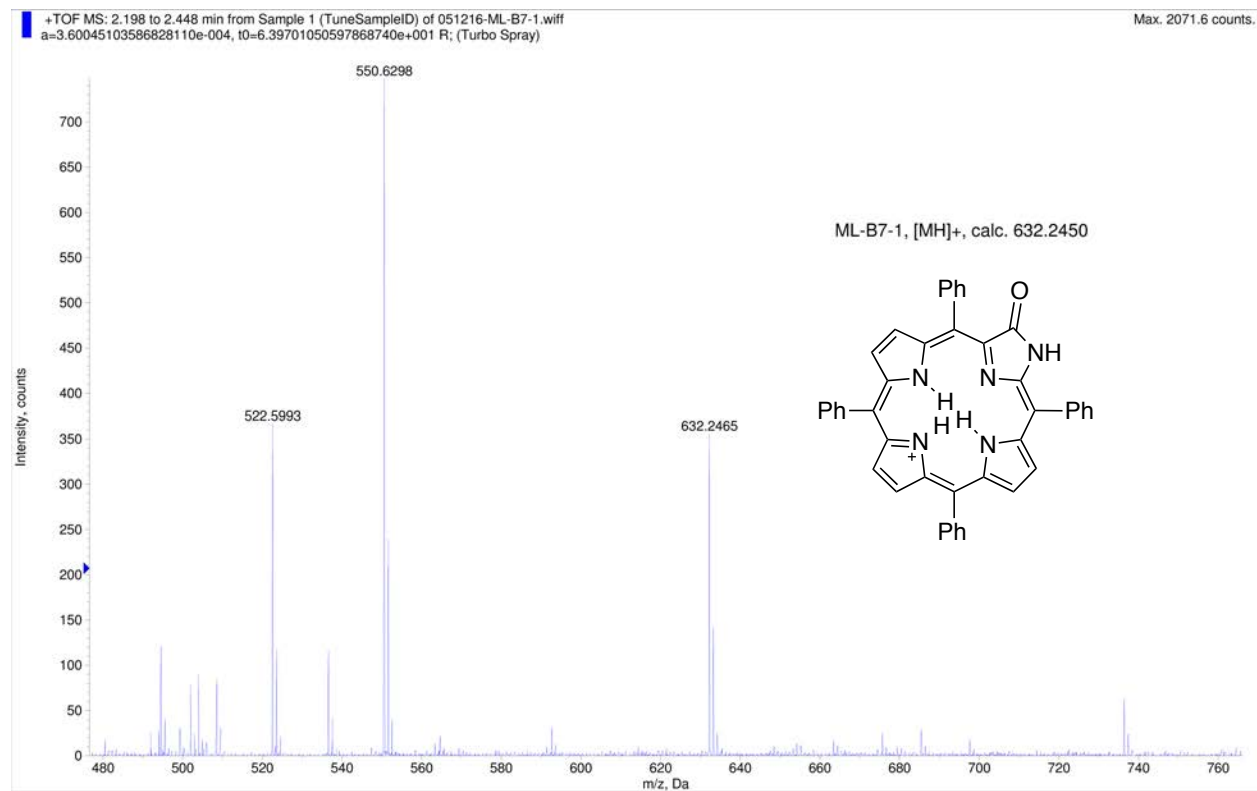

**Figure S13.** HR-MS (ESI<sup>+</sup>, 100% CH<sub>3</sub>CN, TOF) of **10**.

### 1,3,6-Triazocine-2,4-8-trione-based Pyrrole-modified Porphyrin 11.

Dihydroxychlorin-dimethylurea adduct **9** was dissolved in dry THF (5.0 mL) in a RBF equipped with a magnetic stir bar.  $\text{Pb}(\text{OAc})_4$  (13.3 mg,  $3.00 \times 10^{-5}$  mol) was added and the reaction mixture was stirred at ambient temperature. When the starting material was consumed (reaction control by UV-vis and TLC), the solvent was evaporated and the residue separated by preparative TLC (silica- $\text{CH}_2\text{Cl}_2/3\%$  MeOH) to afford **11** as a bright green solid in 71% yield (14.1 mg):  $R_f$  (silica- $\text{CH}_2\text{Cl}_2/2\%$  MeOH) = 0.66;  $^1\text{H}$  NMR (400 MHz,  $\text{CDCl}_3$ ):  $\delta$  8.35 (d,  $^3J = 4.9$  Hz, 1H), 8.28 (br s, 1H), 8.16 (s, 1H), 8.04 (d,  $^3J = 4.9$  Hz, 1H), 7.99 (br s, 2H), 7.70 (m, 4H), 7.56 (t,  $^3J = 7.5$  Hz, 1H), 7.43 (br s, 1H), 7.10 (br s, 1H), 3.28-3.15 (s, 3H), 1.88 (s, 1H, exchangeable with  $\text{D}_2\text{O}$ ) ppm;  $^{13}\text{C}$  NMR (100 MHz,  $\text{CDCl}_3$ ):  $\delta$  173.1, 155.5, 155.1, 147.3, 140.9, 140.21, 140.08, 136.5, 135.5, 133.6, 131.9, 129.2, 128.41, 128.32, 128.13, 127.4, 126.3, 125.5, 119.5, 32.9 ppm; UV-vis ( $\text{CH}_2\text{Cl}_2$ )  $\lambda_{\text{max}}$  (log  $\epsilon$ ) 365 (3.98) 454 (4.76), 578 (3.54), 625 (3.55), 670 (3.40), 741 (3.59) nm; FT-IR (neat, diamond ATR):  $\nu_{\text{C=O}} = 1709.6, 1614.8$   $\text{cm}^{-1}$ ; HR-MS (ESI $^+$ , 100%  $\text{CH}_3\text{CN}$ , TOF)  $m/z$  calcd for  $\text{C}_{47}\text{H}_{34}\text{O}_6\text{N}_3$  ( $[\text{M}\cdot\text{H}]^+$ ), 731.2771 found 731.2775.

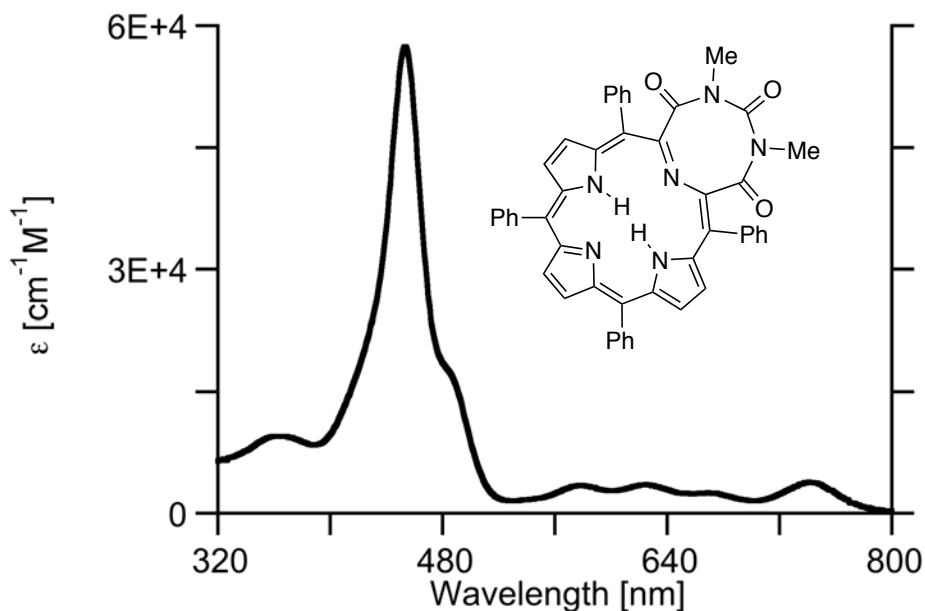

**Figure S14.** UV-vis spectrum ( $\text{CH}_2\text{Cl}_2$ ) of **11**.

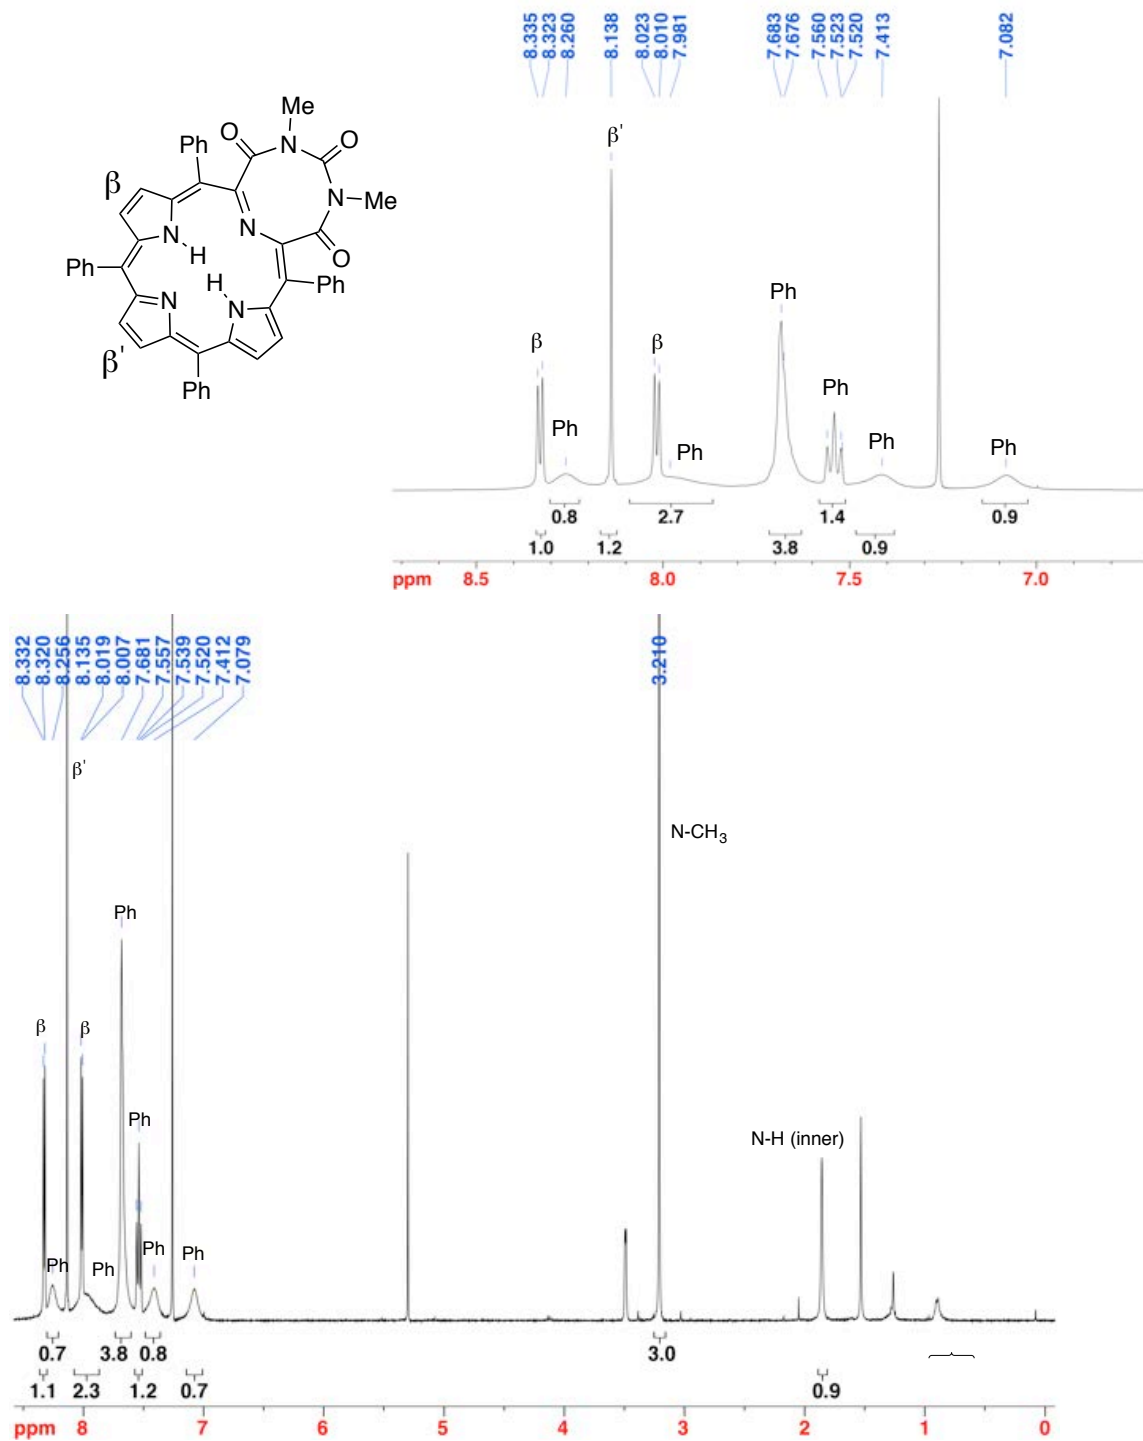

Figure S15. <sup>1</sup>H NMR (400 MHz, CDCl<sub>3</sub>) of 11.



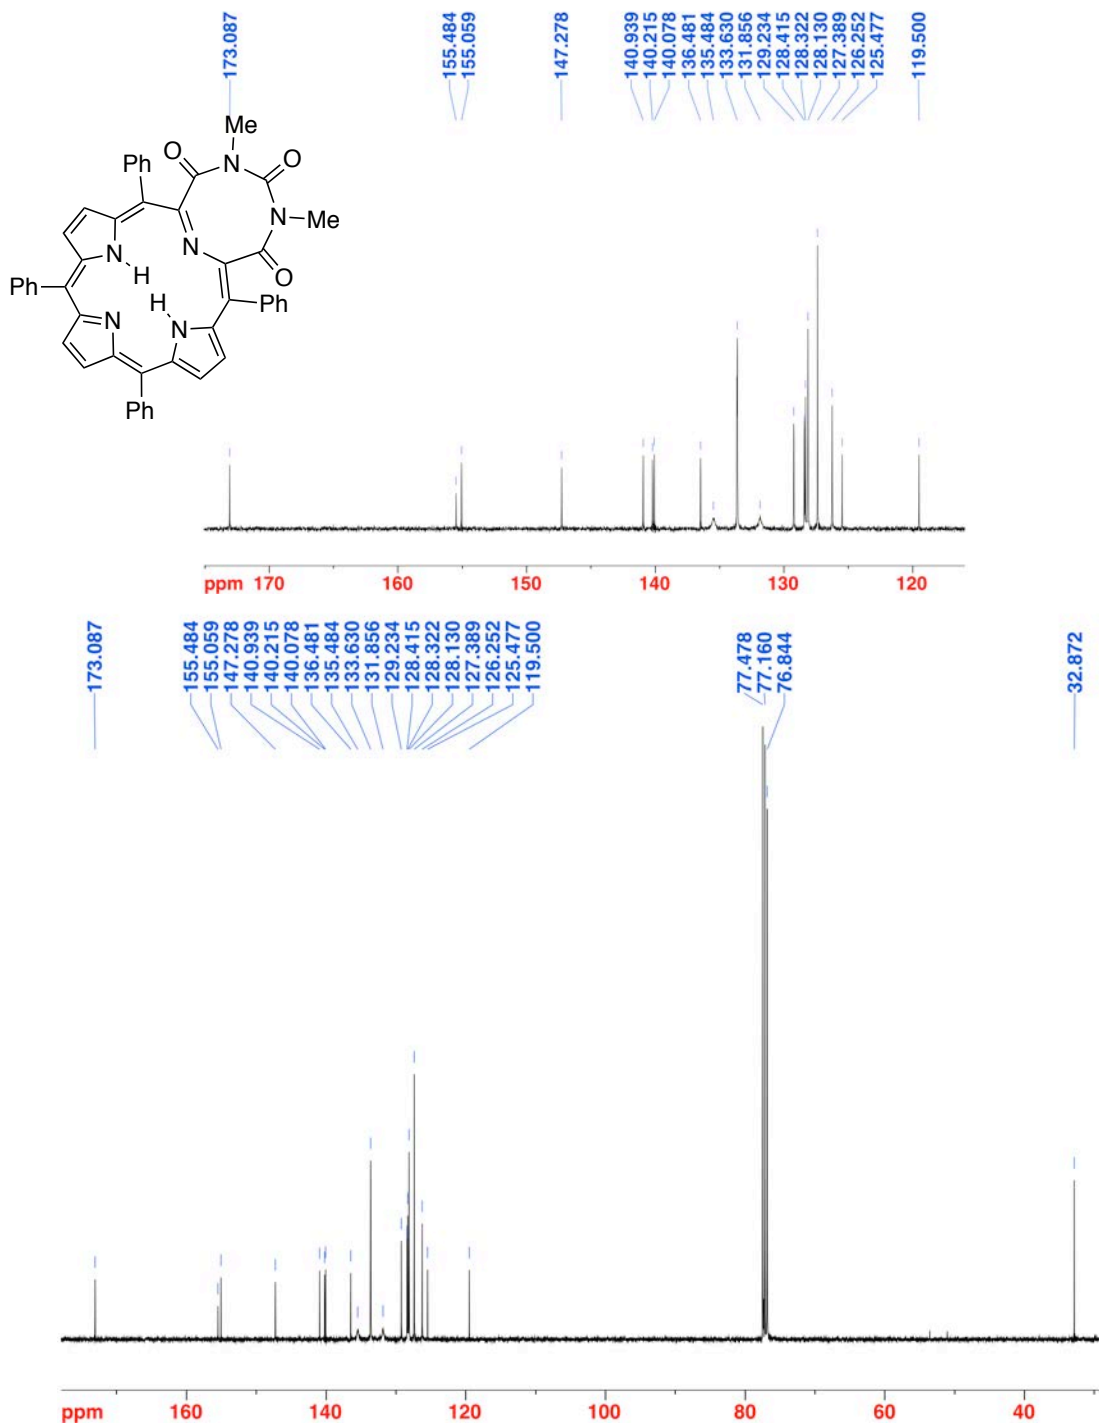

Figure S16. <sup>13</sup>C NMR (100 MHz, CDCl<sub>3</sub>) of 11.

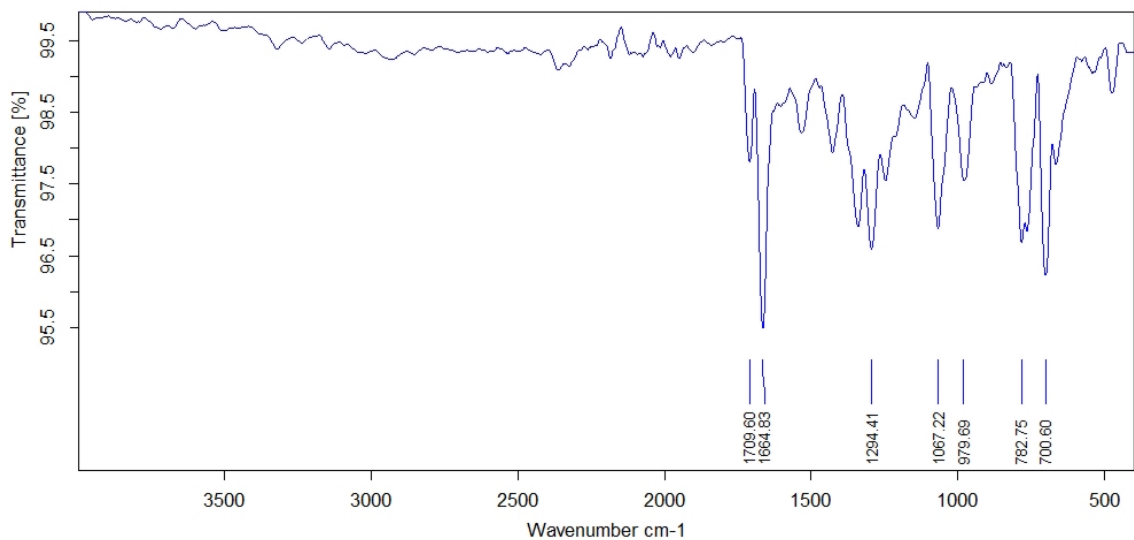

**Figure S17.** FT-IR (neat, diamond ATR) of **11**.

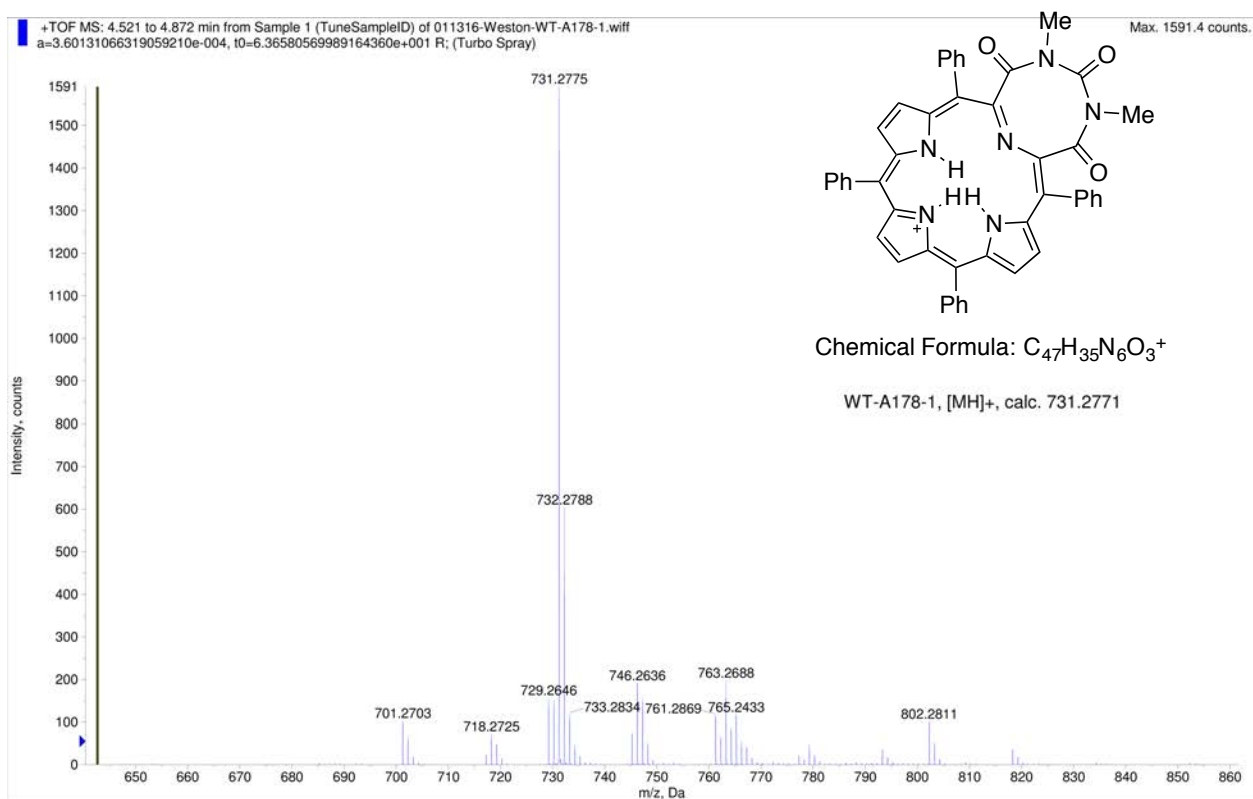

**Figure S18.** HR-MS (ESI<sup>+</sup>, 100% CH<sub>3</sub>CN, TOF) of **11**.

## Crystallographic Details for 1,3,6-Triazocine-2,4,8-trione-based Pyrrole-modified Porphyrin 11:

X-ray diffraction data for **11** were collected using a Rigaku Rapid II curved image plate diffractometer with Cu-K $\alpha$  ( $\lambda = 1.54178 \text{ \AA}$ ). The instrument is equipped with an X-ray microsources with a laterally graded multilayers (Goebel) mirror for monochromatization. Single crystals were mounted on a Mitegen microloop mount using a trace of mineral oil and cooled *in situ* to 100(2) K for data collection. Data were collected using the dtrek option of CrystalClear.<sup>3</sup> and processed using HKL3000 [B] and data were corrected for absorption and scaled using Scalepack.<sup>4</sup> The space group was assigned and the structure solved by direct methods using XPREP and XM within the SHELXTL suite of programs,<sup>5</sup> and refined by full matrix least squares against  $F^2$  with all reflections using Shelxl2014<sup>6</sup> using the graphical interface Shelxle.<sup>7</sup> H atoms attached to carbon and nitrogen atoms and hydroxyl hydrogens were positioned geometrically and constrained to ride on their parent atoms, with N-H distances of 0.88  $\text{\AA}$ , carbon hydrogen bond distances of 0.95  $\text{\AA}$  for and aromatic C-H, 1.00, and 0.98  $\text{\AA}$  for aliphatic C-H and CH<sub>3</sub> moieties, respectively. Methyl H atoms were allowed to rotate but not to tip to best fit the experimental electron density.  $U_{\text{iso}}(\text{H})$  values were set to a multiple of  $U_{\text{eq}}(\text{C})$  with 1.5 for CH<sub>3</sub>, and 1.2 for C-H and N-H units, respectively.

---

(3) Rigaku (2014). CrystalClear-SM Expert 2.1 b32, Rigaku Corp., The Woodlands, Texas, USA.

(4) Otwinowski Z. & Minor, W. (1997). *Methods Enzymol.* 276, 307-327.

(5) a) SHELXTL (Version 6.14) (2000-2003) Bruker Advanced X-ray Solutions, Bruker AXS Inc., Madison, Wisconsin: USA. b) Sheldrick, G. M. (2008). *Acta Cryst.* A64, 112-122.

(6) a) Sheldrick, G. M. (2015). *Acta Cryst.* C71, 3-8. b) Sheldrick, G. M. (2013).

University of Göttingen, Germany.

(7) SHELXLE Rev656, Rev714, SHELXLE. Hübschle, C. B., Sheldrick, G. M. and Dittrich, B. (2011). *J. Appl. Cryst.* 44, 1281-1284.

**Table 1. Experimental Details for X-Ray Analysis of 11**

|                                                                                                                |                                                                                                                                                                                                                                                         |
|----------------------------------------------------------------------------------------------------------------|---------------------------------------------------------------------------------------------------------------------------------------------------------------------------------------------------------------------------------------------------------|
| <b>Crystal data</b>                                                                                            |                                                                                                                                                                                                                                                         |
| Chemical formula                                                                                               | C <sub>47</sub> H <sub>34</sub> N <sub>6</sub> O <sub>3</sub>                                                                                                                                                                                           |
| <i>M<sub>r</sub></i>                                                                                           | 730.80                                                                                                                                                                                                                                                  |
| Crystal system, space group                                                                                    | Orthorhombic, <i>Pca2</i> <sub>1</sub>                                                                                                                                                                                                                  |
| Temperature (K)                                                                                                | 100                                                                                                                                                                                                                                                     |
| <i>a</i> , <i>b</i> , <i>c</i> (Å)                                                                             | 26.853 (2), 10.1988 (10), 27.005 (3)                                                                                                                                                                                                                    |
| <i>V</i> (Å <sup>3</sup> )                                                                                     | 7395.8 (13)                                                                                                                                                                                                                                             |
| <i>Z</i>                                                                                                       | 8                                                                                                                                                                                                                                                       |
| <i>F</i> (000)                                                                                                 | 3056                                                                                                                                                                                                                                                    |
| <i>D<sub>x</sub></i> (Mg m <sup>-3</sup> )                                                                     | 1.312                                                                                                                                                                                                                                                   |
| Radiation type                                                                                                 | Cu <i>K</i> α                                                                                                                                                                                                                                           |
| No. of reflections for cell measurement                                                                        | 68142                                                                                                                                                                                                                                                   |
| 2θ range (°) for cell measurement                                                                              | 3.3–63.5                                                                                                                                                                                                                                                |
| μ (mm <sup>-1</sup> )                                                                                          | 0.67                                                                                                                                                                                                                                                    |
| Crystal shape                                                                                                  | Plate                                                                                                                                                                                                                                                   |
| Colour                                                                                                         | Purple                                                                                                                                                                                                                                                  |
| Crystal size (mm)                                                                                              | 0.34 × 0.27 × 0.01                                                                                                                                                                                                                                      |
| <b>Data collection</b>                                                                                         |                                                                                                                                                                                                                                                         |
| Diffractometer                                                                                                 | Rigaku Rapid II curved image plate diffractometer                                                                                                                                                                                                       |
| Radiation source                                                                                               | microfocus X-ray tube                                                                                                                                                                                                                                   |
| Monochromator                                                                                                  | Laterally graded multilayer (Goebel) mirror                                                                                                                                                                                                             |
| Scan method                                                                                                    | ϕ scans                                                                                                                                                                                                                                                 |
| Absorption correction                                                                                          | Multi-scan, <i>SCALEPACK</i> (Otwinowski & Minor, 1997)                                                                                                                                                                                                 |
| <i>T<sub>min</sub></i> , <i>T<sub>max</sub></i>                                                                | 0.472, 0.993                                                                                                                                                                                                                                            |
| No. of measured, independent and observed [ <i>I</i> > 2σ( <i>I</i> )] reflections                             | 68142, 11219, 5550                                                                                                                                                                                                                                      |
| <i>R<sub>int</sub></i>                                                                                         | 0.140                                                                                                                                                                                                                                                   |
| θ values (°)                                                                                                   | θ <sub>max</sub> = 63.5, θ <sub>min</sub> = 3.3                                                                                                                                                                                                         |
| (sin θ/λ) <sub>max</sub> (Å <sup>-1</sup> )                                                                    | 0.580                                                                                                                                                                                                                                                   |
| Range of <i>h</i> , <i>k</i> , <i>l</i>                                                                        | <i>h</i> = -31→30, <i>k</i> = -11→11, <i>l</i> = -31→31                                                                                                                                                                                                 |
| <b>Refinement</b>                                                                                              |                                                                                                                                                                                                                                                         |
| <i>R</i> [ <i>F</i> <sup>2</sup> > 2σ( <i>F</i> <sup>2</sup> )], <i>wR</i> ( <i>F</i> <sup>2</sup> ), <i>S</i> | 0.157, 0.414, 1.05                                                                                                                                                                                                                                      |
| No. of reflections                                                                                             | 11219                                                                                                                                                                                                                                                   |
| No. of parameters                                                                                              | 1014                                                                                                                                                                                                                                                    |
| No. of restraints                                                                                              | 1                                                                                                                                                                                                                                                       |
| H-atom treatment                                                                                               | H-atom parameters constrained<br><i>w</i> = 1/[σ <sup>2</sup> ( <i>F<sub>o</sub></i> <sup>2</sup> ) + (0.150 <i>P</i> ) <sup>2</sup> + 50. <i>P</i> ]<br>where <i>P</i> = ( <i>F<sub>o</sub></i> <sup>2</sup> + 2 <i>F<sub>c</sub></i> <sup>2</sup> )/3 |
| Δ <sub>max</sub> , Δ <sub>min</sub> (ε Å <sup>-3</sup> )                                                       | 0.96, -0.41                                                                                                                                                                                                                                             |
| Absolute structure                                                                                             | Refined as an inversion twin                                                                                                                                                                                                                            |
| Absolute structure parameter                                                                                   | 0.1 (15)                                                                                                                                                                                                                                                |
